# Supplementary material
Source: PubMed Central journal article supplement (PMC10644263)
Supplement: NIHMS1941560-supplement-Supporting_Material.pdf [file NIHMS1941560-supplement-Supporting_Material.pdf]

## Transition state analogs enhanced by fragment-based structural analysis: Bacterial methylthioadenosine nucleosidases

Di Zhang<sup>#</sup>, Brandon E. Burdette<sup>#</sup>, Zhengyu Wang, Kumari Karn, Hong-yu Li<sup>\*</sup>, Vern L. Schramm<sup>\*</sup>, Peter C. Tyler, Gary B. Evans, and Shanzhi Wang<sup>\*</sup>

Di Zhang<sup>#</sup> - College of Animal Science and Technology, Jilin Agricultural University, Changchun 130118, China; Department of Chemistry, University of Arkansas at Little Rock, Little Rock, Arkansas 72204, United States

Brandon E. Burdette<sup>#</sup> - Department of Chemistry, University of Arkansas at Little Rock, Little Rock, Arkansas 72204, United States

Zhengyu Wang - Department of Pharmaceutical Sciences, University of Arkansas for Medical Science, Little Rock, Arkansas 72205, United States

Kumari Karn - Department of Chemistry, University of Arkansas at Little Rock, Little Rock, Arkansas 72204, United States

Hong-yu Li<sup>\*</sup> - Department of Pharmaceutical Sciences, University of Arkansas for Medical Science, Little Rock, Arkansas 72205, United States; hli2@uams.edu

Vern Schramm<sup>\*</sup> - Department of Biochemistry, Albert Einstein College of Medicine, New York, New York 10461, United States; vern.schramm@einsteinmed.org

Peter C. Tyler - Ferrier Research Institute, Victoria University of Wellington, Wellington 5040, New Zealand;

Gary B. Evans - Ferrier Research Institute, Victoria University of Wellington, Wellington 5040, New Zealand

Shanzhi Wang<sup>\*</sup> - Department of Chemistry, University of Arkansas at Little Rock, Little Rock, Arkansas 72204, United States; sxwang2@ualr.edu

<sup>#</sup> These authors contributed equally.

<sup>\*</sup> Corresponding authors: [hli2@uams.edu](mailto:hli2@uams.edu), [vern.schramm@einsteinmed.org](mailto:vern.schramm@einsteinmed.org), [sxwang2@ualr.edu](mailto:sxwang2@ualr.edu).

### Experimental Procedures.

**MTAN structural analysis.** Crystal structures of bacterial MTANs were from protein data bank files (PDB) by searching “methylthioadenosine nucleosidase” and “adenosylhomocysteine nucleosidase” and “aminodeoxyfutasine nucleosidase”. The structures were analyzed using PyMOL.

**Table S1:** Summary of MTAN structures for Protein Data Bank (PDB).

| No. | PDB code | Mutations | Organisms                  | Ligand bound                                                                                                                    |
|-----|----------|-----------|----------------------------|---------------------------------------------------------------------------------------------------------------------------------|
| 1   | 5CCD     | D198N     | <i>Helicobacter pylori</i> | S-ADENOSYL-L-HOMOCYSTEINE                                                                                                       |
| 2   | 5CCE     | WT        | <i>Helicobacter pylori</i> | (2S)-2-AMINO-4-((2S,3S,4R,5S)-3,4,5-TRIHIDROXYTETRAHYDROFURAN-2-YL)METHYL]SULFANYL)BUTANOIC ACID<br>ADENINE                     |
| 3   | 5JPC     | WT        | <i>Helicobacter pylori</i> | (1S)-1-(7-AMINO-1H-PYRAZOLO[4,3-D]PYRIMIDIN-3-YL)-1,4-ANHYDRO-D-RIBITOL                                                         |
| 4   | 5K1Z     | WT        | <i>Helicobacter pylori</i> | (3R,4S)-1-[(4-AMINO-5H-PYRROLO[3,2-D]PYRIMIDIN-7-YL)METHYL]-4-[(4-CHLOROPHENYL)SULFANYL]METHYL]PYRROLIDIN-3-OL                  |
| 5   | 5KB3     | WT        | <i>Helicobacter pylori</i> | (3R,4S)-1-[(4-AMINO-5H-PYRROLO[3,2-D]PYRIMIDIN-7-YL)METHYL]-4-[(4-CHLOROPHENYL)SULFANYL]METHYL]PYRROLIDIN-3-OL<br>MAGNESIUM ION |
| 6   | 4WKN     | WT        | <i>Helicobacter pylori</i> | (3R,4S)-1-[(4-AMINO-5H-PYRROLO[3,2-D]PYRIMIDIN-7-YL)METHYL]-4-[(METHYLSULFANYL)METHYL]PYRROLIDIN-3-OL                           |

|    |      |       |                            |                                                                                                                                           |
|----|------|-------|----------------------------|-------------------------------------------------------------------------------------------------------------------------------------------|
| 7  | 4WKO | WT    | <i>Helicobacter pylori</i> | (3R,4S)-1-[(4-AMINO-5H-PYRROLO[3,2-D]PYRIMIDIN-7-YL)METHYL]-4-[(4-HYDROXYBUTYL)SULFANYL]METHYL]PYRROLIDIN-3-OL                            |
| 8  | 4WKP | WT    | <i>Helicobacter pylori</i> | (3R,4S)-1-[(4-AMINO-5H-PYRROLO[3,2-D]PYRIMIDIN-7-YL)METHYL]-4-(2-[[2-(2-HYDROXYETHOXY)ETHYL]SULFANYL]ETHYL)PYRROLIDIN-3-OL<br>SULFATE ION |
| 9  | 4YNB | WT    | <i>Helicobacter pylori</i> | GLYCEROL                                                                                                                                  |
|    |      |       |                            | (3R,4S)-1-[(4-AMINO-5H-PYRROLO[3,2-D]PYRIMIDIN-7-YL)METHYL]-4-[(PYRAZIN-2-YLSULFANYL)METHYL]PYRROLIDIN-3-OL<br>DI(HYDROXYETHYL)ETHER      |
| 10 | 4YO8 | WT    | <i>Helicobacter pylori</i> | ZINC ION<br>[[[(4-AMINO-5H-PYRROLO[3,2-D]PYRIMIDIN-7-YL)METHYL](HEXYL)AMINO}METHANOL                                                      |
| 11 | 4OY3 | D198N | <i>Helicobacter pylori</i> | CHLORIDE ION<br>S-ADENOSYL-L-HOMOCYSTEINE                                                                                                 |
| 12 | 4P54 | D198N | <i>Helicobacter pylori</i> | CHLORIDE ION;<br>5'-DEOXY-5'-METHYLTHIOADENOSINE                                                                                          |
| 13 | 4OJT | WT    | <i>Helicobacter pylori</i> | (2S)-2-AMINO-4-([[(2S,3S,4R,5S)-3,4,5-TRIHIDROXYTETRAHYDROFURAN-2-YL]METHYL]SULFANYL)BUTANOIC ACID<br>ADENINE                             |
| 14 | 4BMX | WT    | <i>Helicobacter pylori</i> | 2-AMINO-2-HYDROXYMETHYL-PROPANE-1,3-DIOL<br>ADENINE                                                                                       |
| 15 | 4BMY | D199A | <i>Helicobacter pylori</i> | SULFATE ION                                                                                                                               |
| 16 | 4BMZ | D199N | <i>Helicobacter pylori</i> | 5'-DEOXY-5'-METHYLTHIOADENOSINE                                                                                                           |
| 17 | 4BN0 | E14Q  | <i>Helicobacter pylori</i> | N/A                                                                                                                                       |
| 18 | 4FFS | WT    | <i>Helicobacter pylori</i> | CHLORIDE ION<br>(3R,4S)-1-[(4-AMINO-5H-PYRROLO[3,2-D]PYRIMIDIN-7-YL)METHYL]-4-[(BUTYLSULFANYL)METHYL]PYRROLIDIN-3-OL                      |
| 19 | 3NM4 | WT    | <i>Helicobacter pylori</i> | 1,2-ETHANEDIOL<br>2-AMINO-2-HYDROXYMETHYL-PROPANE-1,3-DIOL                                                                                |
| 20 | 3NM5 | WT    | <i>Helicobacter pylori</i> | (1S)-1-(7-AMINO-1H-PYRAZOLO[4,3-D]PYRIMIDIN-3-YL)-1,4-ANHYDRO-D-RIBITOL                                                                   |
| 21 | 3NM6 | WT    | <i>Helicobacter pylori</i> | 1,2-ETHANEDIOL<br>2-AMINO-2-HYDROXYMETHYL-PROPANE-1,3-DIOL<br>ADENINE                                                                     |
| 22 | 4YML | WT    | <i>Escherichia coli</i>    | PHOSPHATE ION<br>(3S,4R)-1-[(4-AMINO-5H-PYRROLO[3,2-D]PYRIMIDIN-7-YL)METHYL]-4-[(METHYLSULFANYL)METHYL]PYRROLIDIN-3-OL                    |
| 23 | 4WKC | WT    | <i>Escherichia coli</i>    | TETRAETHYLENE GLYCOL<br>(3R,4S)-1-[(4-AMINO-5H-PYRROLO[3,2-D]PYRIMIDIN-7-YL)METHYL]-4-[(BUTYLSULFANYL)METHYL]PYRROLIDIN-3-OL              |
| 24 | 3DF9 | WT    | <i>Escherichia coli</i>    | (3R,4S)-1-[(4-AMINO-5H-PYRROLO[3,2-D]PYRIMIDIN-7-YL)METHYL]-4-[(BENZYLSULFANYL)METHYL]PYRROLIDIN-3-OL                                     |
| 25 | 1Z5N | E12Q  | <i>Escherichia coli</i>    | 5-S-METHYL-5-THIO-ALPHA-D-RIBOFURANOSE<br>ADENINE                                                                                         |

|    |      |       |                             |                                                                                                             |
|----|------|-------|-----------------------------|-------------------------------------------------------------------------------------------------------------|
| 26 | 1Z5O | D197N | <i>Escherichia coli</i>     | 5'-DEOXY-5'-METHYLTHIOADENOSINE                                                                             |
| 27 | 1Z5P | WT    | <i>Escherichia coli</i>     | 3,6,9,12,15,18,21,24-OCTAOXAHEXACOSAN-1-OL                                                                  |
|    |      |       |                             | GLYCEROL                                                                                                    |
|    |      |       |                             | ISOPROPYL ALCOHOL                                                                                           |
| 28 | 1Y6Q | WT    | <i>Escherichia coli</i>     | CHLORIDE ION                                                                                                |
|    |      |       |                             | (3R,4S)-1-[(4-AMINO-5H-PYRROLO[3,2-D]PYRIMIDIN-7-YL)METHYL]-4-[(METHYLSULFANYL)METHYL]PYRROLIDIN-3-OL       |
| 29 | 1Y6R | WT    | <i>Escherichia coli</i>     | (3S,4R)-2-(4-AMINO-5H-PYRROLO[3,2-D]PYRIMIDIN-7-YL)-5-[(METHYLSULFANYL)METHYL]PYRROLIDINE-3,4-DIOL          |
| 30 | 1NC1 | WT    | <i>Escherichia coli</i>     | 2-(4-AMINO-PYRROLO[2,3-D]PYRIMIDIN-7-YL)-5-METHYLSULFANYLMETHYL-TETRAHYDRO-FURAN-3,4-DIOL                   |
| 31 | 1NC3 | WT    | <i>Escherichia coli</i>     | (1S)-1-(7-AMINO-1H-PYRAZOLO[4,3-D]PYRIMIDIN-3-YL)-1,4-ANHYDRO-D-RIBITOL                                     |
| 32 | 1JYS | WT    | <i>Escherichia coli</i>     | ADENINE                                                                                                     |
| 33 | 6AYM | WT    | <i>Campylobacter jejuni</i> | 1,2-ETHANEDIOL                                                                                              |
| 34 | 6AYO | WT    | <i>Campylobacter jejuni</i> | (3R,4S)-1-[(4-AMINO-5H-PYRROLO[3,2-D]PYRIMIDIN-7-YL)METHYL]-4-PROPYLPYRROLIDIN-3-OL                         |
|    |      |       |                             | 1,2-ETHANEDIOL                                                                                              |
|    |      |       |                             | 2-[BIS-(2-HYDROXY-ETHYL)-AMINO]-2-HYDROXYMETHYL-PROPANE-1,3-DIOL                                            |
| 35 | 6AYQ | WT    | <i>Campylobacter jejuni</i> | GLYCEROL                                                                                                    |
|    |      |       |                             | (3R,4S)-1-[(4-AMINO-5H-PYRROLO[3,2-D]PYRIMIDIN-7-YL)METHYL]-4-[(METHYLSULFANYL)METHYL]PYRROLIDIN-3-OL       |
| 36 | 6AYR | WT    | <i>Campylobacter jejuni</i> | 1,2-ETHANEDIOL                                                                                              |
|    |      |       |                             | (3R,4S)-1-[(4-AMINO-5H-PYRROLO[3,2-D]PYRIMIDIN-7-YL)METHYL]-4-[(BUTYLSULFANYL)METHYL]PYRROLIDIN-3-OL        |
| 37 | 6AYS | WT    | <i>Campylobacter jejuni</i> | 1,2-ETHANEDIOL                                                                                              |
|    |      |       |                             | (3R,4S)-1-[(4-AMINO-5H-PYRROLO[3,2-D]PYRIMIDIN-7-YL)METHYL]-4-[(HEXYLSULFANYL)METHYL]PYRROLIDIN-3-OL        |
| 38 | 6AYT | WT    | <i>Campylobacter jejuni</i> | 1,2-ETHANEDIOL                                                                                              |
|    |      |       |                             | (3R,4S)-1-[(4-AMINO-5H-PYRROLO[3,2-D]PYRIMIDIN-7-YL)METHYL]-4-[(PYRAZIN-2-YLSULFANYL)METHYL]PYRROLIDIN-3-OL |
| 39 | 6IF8 | WT    | <i>Aeromonas hydrophila</i> | ADENINE                                                                                                     |
| 40 | 5B7G | WT    | <i>Aeromonas hydrophila</i> | GLYCEROL;                                                                                                   |
|    |      |       |                             | ADENINE                                                                                                     |
| 41 | 5B7N | WT    | <i>Aeromonas hydrophila</i> | GLYCEROL;                                                                                                   |
|    |      |       |                             | S-ADENOSYL-L-HOMOCYSTEINE                                                                                   |
| 42 | 5B7P | WT    | <i>Aeromonas hydrophila</i> | 5'-DEOXY-5'-METHYLTHIOADENOSINE                                                                             |
| 43 | 5B7Q | WT    | <i>Aeromonas hydrophila</i> | 5'-DEOXYADENOSINE                                                                                           |
| 44 | 4F1W | WT    | <i>Salmonella enterica</i>  | 1,2-ETHANEDIOL;                                                                                             |
|    |      |       |                             | TETRAETHYLENE GLYCOL;                                                                                       |
|    |      |       |                             | TRIETHYLENE GLYCOL;                                                                                         |
|    |      |       |                             | DI(HYDROXYETHYL)ETHER;                                                                                      |
|    |      |       |                             | ADENINE                                                                                                     |

|    |      |                      |                                    |                                                                                                                           |
|----|------|----------------------|------------------------------------|---------------------------------------------------------------------------------------------------------------------------|
| 45 | 4F2P | WT                   | <i>Salmonella enterica</i>         | ACETATE ION;                                                                                                              |
|    |      |                      |                                    | GLYCEROL;                                                                                                                 |
|    |      |                      |                                    | 1,2-ETHANEDIOL;                                                                                                           |
|    |      |                      |                                    | (3R,4S)-1-[(4-AMINO-5H-PYRROLO[3,2-D]PYRIMIDIN-7-YL)METHYL]-4-({[2-(2-HYDROXYETHOXY)ETHYL]SULFANYL}METHYL)PYRROLIDIN-3-OL |
| 46 | 4F2W | WT                   | <i>Salmonella enterica</i>         | CHLORIDE ION;                                                                                                             |
|    |      |                      |                                    | 1,2-ETHANEDIOL;                                                                                                           |
|    |      |                      |                                    | (3R,4S)-1-[(4-AMINO-5H-PYRROLO[3,2-D]PYRIMIDIN-                                                                           |
|    |      |                      |                                    | 7-YL)METHYL]-4-[(METHYLSULFANYL)METHYL]PYRROLIDIN-3-OL                                                                    |
| 47 | 4F3C | WT                   | <i>Salmonella enterica</i>         | 1,2-ETHANEDIOL;                                                                                                           |
|    |      |                      |                                    | (3R,4S)-1-[(4-AMINO-5H-PYRROLO[3,2-D]PYRIMIDIN-7-YL)METHYL]-4-[(BUTYLSULFANYL)METHYL]PYRROLIDIN-3-OL                      |
| 48 | 4F3K | WT                   | <i>Salmonella enterica</i>         | {(3R,4S)-1-[(4-AMINO-5H-PYRROLO[3,2-D]PYRIMIDIN-7-YL)METHYL]-4-HYDROXPYRROLIDIN-3-YL}-L-                                  |
|    |      |                      |                                    | METHIONINE;                                                                                                               |
|    |      |                      |                                    | 1,2-ETHANEDIOL                                                                                                            |
| 49 | 3LGS | WT                   | <i>Arabidopsis thaliana</i>        | 1,2-ETHANEDIOL;                                                                                                           |
|    |      |                      |                                    | S-ADENOSYL-L-HOMOCYSTEINE; ADENINE                                                                                        |
| 50 | 2QSU | WT                   | <i>Arabidopsis thaliana</i>        | N/A                                                                                                                       |
| 51 | 2QTG | WT                   | <i>Arabidopsis thaliana</i>        | 2-(4-AMINO-PYRROLO[2,3-D]PYRIMIDIN-7-YL)-5-METHYLSULFANYLMETHYL-TETRAHYDRO-FURAN-3,4-DIOL;                                |
|    |      |                      |                                    | 1,2-ETHANEDIOL                                                                                                            |
| 52 | 2QTT | WT                   | <i>Arabidopsis thaliana</i>        | (1S)-1-(7-AMINO-1H-PYRAZOLO[4,3-D]PYRIMIDIN-3-YL)-1,4-ANHYDRO-D-RIBITOL;                                                  |
|    |      |                      |                                    | 1,2-ETHANEDIOL;                                                                                                           |
|    |      |                      |                                    | ADENINE                                                                                                                   |
| 53 | 2H8G | WT                   | <i>Arabidopsis thaliana</i>        | ADENINE                                                                                                                   |
| 54 | 4WKB | WT                   | <i>Vibrio cholerae</i>             | (3R,4S)-1-[(4-AMINO-5H-PYRROLO[3,2-D]PYRIMIDIN-7-YL)METHYL]-4-[(METHYLSULFANYL)METHYL]PYRROLIDIN-3-OL                     |
| 55 | 4X24 | A113P/V153I/R158G    | <i>Vibrio cholerae</i>             | (3R,4S)-1-[(4-AMINO-5H-PYRROLO[3,2-D]PYRIMIDIN-7-YL)METHYL]-4-[(METHYLSULFANYL)METHYL]PYRROLIDIN-3-OL;                    |
|    |      |                      |                                    | TRIETHYLENE GLYCOL                                                                                                        |
| 56 | 3DP9 | WT                   | <i>Vibrio cholerae</i>             | IODIDE ION;                                                                                                               |
|    |      |                      |                                    | (3R,4S)-1-[(4-AMINO-5H-PYRROLO[3,2-D]PYRIMIDIN-7-YL)METHYL]-4-[(BUTYLSULFANYL)METHYL]PYRROLIDIN-3-OL                      |
| 57 | 3MMS | A23T/V39A/V64D/A184T | <i>Streptococcus pneumoniae</i>    | GLYCEROL;                                                                                                                 |
|    |      |                      |                                    | 9H-PURINE-6,8-DIAMINE                                                                                                     |
| 58 | 1ZOS | WT                   | <i>Streptococcus pneumoniae</i>    | (3S,4R)-2-(4-AMINO-5H-PYRROLO[3,2-D]PYRIMIDIN-7-YL)-5-[(METHYLSULFANYL)METHYL]PYRROLIDINE-3,4-DIOL                        |
| 59 | 4GMH | WT                   | <i>Staphylococcus aureus</i>       | ACETATE ION                                                                                                               |
| 60 | 4KN5 | WT                   | <i>Weissella paramesenteroides</i> | GLYCEROL                                                                                                                  |
|    |      |                      |                                    | 1,2-ETHANEDIOL                                                                                                            |
| 61 | 4G41 | WT                   | <i>Streptococcus</i>               | 5'-DEOXY-5'-METHYLTHIOADENOSINE                                                                                           |

|    |      |    |                                  |                                                                                                    |
|----|------|----|----------------------------------|----------------------------------------------------------------------------------------------------|
|    |      |    | <i>pyogenes</i>                  |                                                                                                    |
| 62 | 5DK6 | WT | <i>Colwellia psychrerythraea</i> | GLYCINE<br>ADENINE                                                                                 |
| 63 | 3EEI | WT | <i>Neisseria meningitidis</i>    | (3S,4R)-2-(4-AMINO-5H-PYRROLO[3,2-D]PYRIMIDIN-7-YL)-5-[(METHYLSULFANYL)METHYL]PYRROLIDINE-3,4-DIOL |
| 64 | 4QEZ | WT | <i>Bacillus anthracis</i>        | 2-AMINO-2-HYDROXYMETHYL-PROPANE-1,3-DIOL<br>ADENINE                                                |
| 65 | 4PR3 | WT | <i>Brucella melitensis</i>       | PHOSPHATE ION<br>GLYCEROL<br>ADENINE                                                               |

|    |      |       |                                   |                                                                                                             |
|----|------|-------|-----------------------------------|-------------------------------------------------------------------------------------------------------------|
| 66 | 4JWT | WT    | <i>Sulfurimonas denitrificans</i> | 1,2-ETHANEDIOL<br>ADENINE                                                                                   |
| 67 | 4LOM | WT    | <i>Borrelia burgdorferi</i>       | ADENINE                                                                                                     |
| 68 | 3BL6 | WT    | <i>Staphylococcus aureus</i>      | (1S)-1-(7-AMINO-1H-PYRAZOLO[4,3-D]PYRIMIDIN-3-YL)-1,4-ANHYDRO-D-RIBITOL                                     |
| 69 | 5UE1 | WT    | <i>Aliivibrio fischeri</i>        | CHLORIDE ION<br>CALCIUM ION<br>1,2-ETHANEDIOL<br>9-DEAZAADENINE<br>2-AMINO-2-HYDROXYMETHYL-PROPANE-1,3-DIOL |
| 70 | 4G89 | WT    | <i>Klebsiella pneumoniae</i>      | SULFATE ION;<br>S-ADENOSYL-L-HOMOCYSTEINE;<br>ADENINE                                                       |
| 71 | 4QAA | WT    | <i>Chlamydia trachomatis</i>      | SULFATE ION                                                                                                 |
| 72 | 4QFB | WT    | <i>Chlamydia trachomatis</i>      | N/A                                                                                                         |
| 73 | 4QAR | WT    | <i>Chlamydia trachomatis</i>      | SULFATE ION<br>ADENINE                                                                                      |
| 74 | 4QAT | D161N | <i>Chlamydia trachomatis</i>      | 5'-DEOXY-5'-METHYLTHIOADENOSINE                                                                             |
| 75 | 4JOS | WT    | <i>Francisella philomiragia</i>   | SODIUM ION<br>1,2-ETHANEDIOL<br>ADENINE                                                                     |

**Protein purification.** *HpMTAN* and *SaMTAN* were purified using the same protocol as previously described.<sup>1,2</sup> Briefly, *HpMTAN* in pET28, bearing an N-terminal 6 x His tag was chemically transformed into BL21 (DE3) cells that were grown overnight on a kanamycin-containing (50 mg/mL) nutrient agar plate. Subsequently, single colonies were picked to grow in LB broth media at 37 °C until the O.D. at 600 nm reached 0.6. Isopropyl β-D-1-thiogalactopyranoside (IPTG) was added to reach a final concentration of 0.5 mM, and cells were incubated for an additional 4 hours before harvesting by centrifugation. The cell pellet was suspended in cold buffer containing 20 mM Hepes (pH 7.5), 100 mM NaCl, 0.1 mM PMSF, 50 μg/mL of lysozyme and a few crystals of DNase I and RNase A. Resuspended cells were stirred for ~ 30 min on ice, then treated with sonication (6 intervals, 1 min/interval) followed by centrifugation at 14,000 rpm, at 4 °C, for 1hr. Additional PMSF was added twice with intervals of ~ 30 min. The supernatant of centrifugation was loaded onto a Co-NTA column preequilibrated with 20 mM Hepes (pH 7.5) and 100 mM NaCl. Using gradually increased concentrations of imidazole (buffered to pH 7.5), *HpMTAN* was eluted from the column and fractions with purity

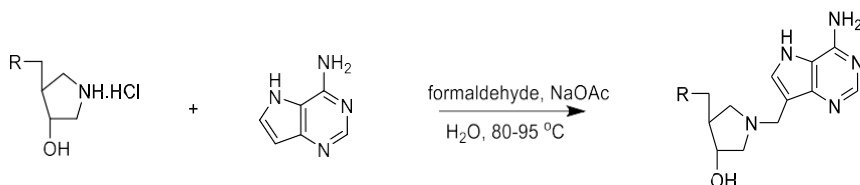

over 90% were dialyzed with 20 mM Hepes (pH 7.5) and 100 mM NaCl.

**Inhibitor synthesis and analysis.** Synthesis of inhibitors has been described previously.<sup>3</sup> Briefly, the condensation reactions of an imidazo-[1,2-a]-pyridine derivative with a pyrrolidine nucleoside were performed using the Mannich reaction, shown below, where R are fragment derivatives. The structure and purity of the synthesized inhibitors were originally evaluated using NMR, HPLC, and MS, and the samples here were reanalyzed by the same methods to assure purity.<sup>3,4</sup> All inhibitors were found to be >98% as originally described, by the methods below.

**High-Performance Liquid Chromatography Analysis (HPLC) analysis.** HPLC of all inhibitors was performed prior use to assay to assure purity. An Agilent (Santa Clara, Ca) Eclipse XDB-C18 column with an Agilent 1100A HPLC system was used. The column was maintained at 37°C for the duration of HPLC. Elution was performed with a flow rate of 1mL/min using a solvent gradient of 5-95% ethanol with 0.1% v/v formic acid (solvent B), in a water background with 0.1% v/v formic acid (solvent A). Each inhibitor was solubilized in HPLC grade MeOH (Sigma-Aldrich, St Louis, MO) to be approximately 1mM in concentration. With a 15 μL injection volume, the elution took place over 15 minutes from 5% solvent B to 95% solvent B monitoring at 274nm, with an additional 5 minutes wash at 95% solvent B. Compound 7 had an additional 5 min wash with 95% solvent B due to hydrophobicity. Peaks were analyzed and collected. This peak sample was then run on mass spectrometry for confirmation of the identity of the peak.

**Mass Spectrometry (MS) analysis.** MS was performed on the collected eluted compound from HPLC testing mentioned above. MS was performed using a Thermo Finnigan LCQ Deca (Waltham, MA). The MS was performed using 20 μL of the inhibitors previously prepared for HPLC. The injection speed was set to 8 μL/s. The MS monitored positive ions with a 10 Hz channel sample rate, under atmospheric pressure and was ionized using a corona discharge needle in the nebulizer of the instrument. The detected peaks were analyzed using Xcalibur software (Thermo-Fisher, Waltham, MA). MTDIA and compounds 2-6 were analyzed using positive mode and compound 7 was analyzed using negative mode.

**NMR analysis.** 0.5 - 1 mg of each inhibitor was dissolved in 750μL of CD3OD (VWR, Radnor, Pa.). <sup>1</sup>H-NMR (400 MHz) was performed using a JEOL ECS NMR Spectrometer (Tokyo, Japan) and data was analyzed using Delta 5.2.1 Software (JEOL). For each experiment, 20,000 scans were used with an X\_offset of 7.

**Enzymatic assay.** At 25 °C or 37 °C, assay solutions contained 50 mM Hepes (pH 7.5), 100 mM NaCl, 0.87 mM MTA, catalase (5 units/mL) and xanthine oxidase (0.5 unit/mL). Reactions were started by adding *HpMTAN* or *SaMTAN* to reach a final concentration of 5 nM and monitored by following the increase of absorption at 295 nM. Reaction kinetics were measured at six different inhibitor concentrations (ranging from 0 to 50,000 nM) for the transition state analogue inhibitors. A reaction without enzyme added served as the control to be subtracted during data analysis. The assays were monitored for 2 hours to analyze for slow-onset binding. Inhibitors with slow-onset binding have a two-step inhibition chronologically. Initial inhibition ( $K_i$ ) occurs

by rapid binding followed by the slow onset of more potent inhibition, resulting in a decreased but constant rate ( $K_i^*$ ) due to slow-onset binding. For PEG2.5, PEG3 and PEG4, a direct assay was performed by monitoring the absorption decrease at 275 nm for conversion of MTA to adenine. Assay solutions contained 50 mM Hepes (pH 7.5), 100 mM NaCl, 0.09 mM MTA, and PEG2.5 or PEG3 or PEG4 (0 – 300 mM).

Kinetics were analyzed using KaleidaGraph (Synergy Software) by fitting data to the following equation,  

$$v/v_0 = (K_m + [S]) / (K_m + [S] + (K_m [I]) / K_i)$$

Here,  $v_0$  and  $v$  are the measured steady-state kinetics in the absence and presence of an inhibitor, respectively;  $[S]$  and  $[I]$  are the concentrations of MTA and a given inhibitor, respectively;  $K_m$  is the Michaelis-Menten constant for MTA.

**Table S2:**  $K_m$ ,  $K_i$  and  $K_i^*$  for HpMTAN at 25 °C and 37 °C.

| Inhibitor<br>(HpMTAN)                                                                            | $K_i$ @ 25°C<br>(nM)                                            | $K_i^*$ @ 25°C<br>(nM)                    | $K_i$ @ 37°C<br>(nM)                            |
|--------------------------------------------------------------------------------------------------|-----------------------------------------------------------------|-------------------------------------------|-------------------------------------------------|
| 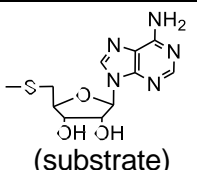<br>(substrate) | $0.6 \times 10^3 \pm 0.3 \times 10^3$ <sup>a</sup><br>( $K_m$ ) |                                           | $4.1 \times 10^3 \pm 0.5 \times 10^3$ ( $K_m$ ) |
|                 | $0.19 \pm 0.03$ <sup>a</sup>                                    | $0.089 \pm 0.019$ <sup>a</sup>            | $1.25 \pm 0.16$                                 |
|                 | $0.96 \pm 0.16$ <sup>a</sup>                                    | $0.015 \pm 0.004$ <sup>a</sup>            | $0.09 \pm 0.01$                                 |
|                 | $0.34 \pm 0.07$ <sup>a</sup>                                    | $0.11 \pm 0.04$ <sup>a</sup>              | $0.79 \pm 0.08$                                 |
|                | $0.43 \pm 0.12$ <sup>a</sup>                                    | $0.04 \pm 0.01$ <sup>a</sup>              | $0.74 \pm 0.21$                                 |
|               | $0.89 \pm 0.13$ <sup>a</sup>                                    | $0.10 \pm 0.01$ <sup>a</sup>              | $0.31 \pm 0.07$                                 |
|               | $0.26 \pm 0.03$ <sup>a</sup>                                    | $0.05 \pm 0.01$ <sup>a</sup>              | $0.28 \pm 0.03$                                 |
|               | $4.2 \pm 1.2$ <sup>a</sup>                                      | N/A <sup>a</sup>                          | $1.08 \pm 0.15$                                 |
| <b>Fragment</b>                                                                                  | <b><math>K_i</math> @ 25°C<br/>(mM)</b>                         | <b><math>K_i^*</math> @ 25°C<br/>(nM)</b> | <b><math>K_i</math> @ 37°C<br/>(mM)</b>         |
| <br>(PEG2.5)  | $16 \pm 3$                                                      | N/A                                       | $> 100$                                         |
| <br>(PEG3)    | $2.3 \pm 0.2$                                                   | N/A                                       | $13 \pm 1$                                      |
| <br>(PEG)     | $7.1 \pm 3.5$                                                   | N/A                                       | $54 \pm 19$                                     |

<sup>a</sup>These are reported values of  $K_m$ ,  $K_i$  or  $K_i^*$  from references.<sup>1,3,4</sup>



**Table S3:**  $K_m$ ,  $K_i$  and  $K_i^*$  for SaMTAN at 25 °C and 37 °C.

| Inhibitor<br>(SaMTAN)                                                                            | $K_i$ @ 25°C<br>(nM)                                            | $K_i^*$ @ 25°C<br>(nM) | $K_i$ @ 37°C<br>(nM)                               |
|--------------------------------------------------------------------------------------------------|-----------------------------------------------------------------|------------------------|----------------------------------------------------|
| 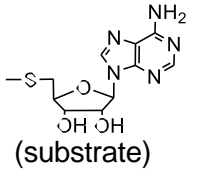<br>(substrate) | $0.9 \times 10^3 \pm 0.3 \times 10^3$ <sup>a</sup><br>( $K_m$ ) |                        | $5.1 \times 10^3 \pm 1.3 \times 10^3$<br>( $K_m$ ) |
|                 | $0.16 \pm 0.03$                                                 | $0.054 \pm 0.001$      | $7.8 \pm 0.1$                                      |
|                 | $0.078 \pm 0.015$                                               | $0.0058 \pm 0.0009$    | $0.096 \pm 0.016$                                  |
|                 | $0.17 \pm 0.02$                                                 | $0.013 \pm 0.002$      | $0.51 \pm 0.11$                                    |
|                | $0.077 \pm 0.017$                                               | $0.014 \pm 0.002$      | $0.58 \pm 0.11$                                    |
|               | $0.097 \pm 0.017$                                               | $0.022 \pm 0.003$      | $0.11 \pm 0.034$                                   |
|               | $0.19 \pm 0.06$                                                 | $0.055 \pm 0.001$      | $18 \pm 5.3$                                       |
|               | $2.3 \pm 0.3$                                                   | $0.47 \pm 0.14$        | > 20                                               |
| <b>Fragment</b>                                                                                  | $K_i$ @ 25°C<br>(mM)                                            | $K_i^*$ @ 25°C<br>(nM) | $K_i$ @ 37°C<br>(mM)                               |
| <br>(PEG2.5)  | $6.2 \pm 0.8$                                                   | N/A                    | > 100                                              |
| <br>(PEG3)    | $2.6 \pm 0.5$                                                   | N/A                    | $27 \pm 8$                                         |
| <br>(PEG4)    | $2.8 \pm 0.3$                                                   | N/A                    | $41 \pm 9$                                         |

<sup>a</sup> These are reported values of  $K_m$  from references.<sup>5</sup>

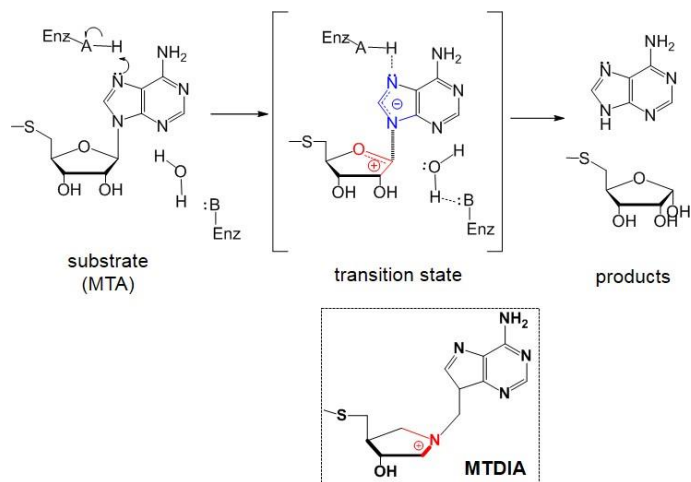

**Figure S1:** Transition state of MTAN reaction and lead inhibitor MTDIA.

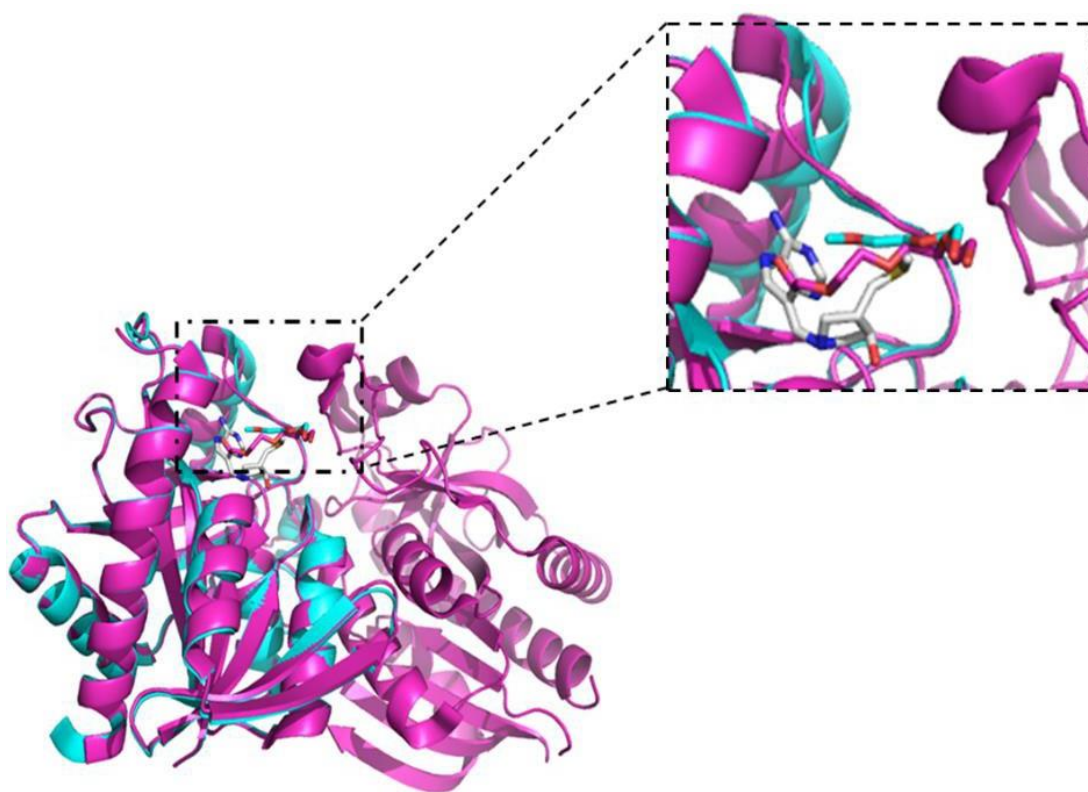

**Figure S2:** Structural alignment of PEG2.5 bound *Ec*MTAN (PDB file 1Z5P) and PEG3 bound *Se*MTAN (PDB file 4F1W). *Ec*MTAN bound with PEG2.5 is in cyan; *Se*MTAN bound with PEG3 is in magenta. MTDIA was modeled into the active site of *Se*MTAN in grey.

## References

1. Wang, S., Haapalainen, A. M., Yan, F., Du, Q., Tyler, P. C., Evans, G. B., Rinaldo-Matthis, A., Brown, R. L., Norris, G. E., Almo, S. C., and Schramm, V. L. (2012) A picomolar transition state analog inhibitor of MTAN as a specific antibiotic for *Helicobacter pylori*, *Biochemistry* 51, 6892-6894.
2. Gutierrez, J. A., Luo, M., Singh, V., Li, L., Brown, R. L., Norris, G. E., Evans, G. B., Furneaux, R. H., Tyler, P. C., Painter, G. F., Lenz, D. H., and Schramm, V. L. (2007) Picomolar inhibitors as transition-state probes of 5'-methylthioadenosine nucleosidases, *ACS chemical biology* 2, 725-734.
3. Wang, S., Cameron, S. A., Clinch, K., Evans, G. B., Wu, Z., Schramm, V. L., and Tyler, P. C. (2015) New Antibiotic Candidates against *Helicobacter pylori*, *J Am Chem Soc* 137, 14275-14280.
4. Schramm, V. L., Wang, S., Haapalainen, A. M., Evans, G. B., Furneaux, R. H., Clinch, K., Tyler, P. C., and Gulab, S. Treatment of *Helicobacter pylori* infections. U.S. Appl. US20150210701A1, 2015.
5. Wang, S., Thomas, K., and Schramm, V. L. (2014) Catalytic site cooperativity in dimeric methylthioadenosine nucleosidase, *Biochemistry* 53, 1527-1535.
